# Supplementary material
Source: publisher figshare collection journal article supplement (https://frontiersin.figshare.com/ndownloader/files/14520722)
Supplement: Supplementary file 1 [file 14520722]

Supplemental Table 1. Horse trail fen core data adapted from Jones et al., 2014

| Depth<br>(cm) | <i>Sphagnum</i><br><i>spp.</i> (%) | <i>Tomenthypnum</i><br><i>nitens</i> (%) | Other<br>brown<br>moss<br>(%) | Sedge<br>( <i>Carex</i> )<br>(%) | Bryophyte<br>total (%) | non-<br>bryophyte<br>/sedge<br>components<br>(%) | $\delta^{18}\text{O}$<br>raw<br>bulk*<br>(‰) | $\delta^{18}\text{O}$ to<br>cellulose<br>(‰)** |
|---------------|------------------------------------|------------------------------------------|-------------------------------|----------------------------------|------------------------|--------------------------------------------------|----------------------------------------------|------------------------------------------------|
| 10.00         | 97.06                              | 0.00                                     | 2.94                          | 0.00                             | 100.00                 | 0.00                                             | 12.86                                        | 12.95                                          |
| 14.00         | 88.46                              | 0.00                                     | 0.00                          | 11.54                            | 88.46                  | 0.00                                             | 11.20                                        | 11.27                                          |
| 18.00         | 90.32                              | 0.00                                     | 0.00                          | 9.68                             | 90.32                  | 0.00                                             | 11.05                                        | 11.12                                          |
| 22.00         | 47.62                              | 0.00                                     | 0.00                          | 52.38                            | 47.62                  | 0.00                                             | 9.40                                         | 9.45                                           |
| 26.00         | 16.67                              | 0.00                                     | 0.00                          | 83.33                            | 16.67                  | 0.00                                             | 7.72                                         | 7.74                                           |
| 30.00         | 66.67                              | 0.00                                     | 3.33                          | 30.00                            | 70.00                  | 0.00                                             | 8.51                                         | 8.55                                           |
| 34.00         | 56.00                              | 0.00                                     | 0.00                          | 44.00                            | 56.00                  | 0.00                                             | 10.32                                        | 10.38                                          |
| <b>38.00</b>  | <b>67.74</b>                       | <b>0.00</b>                              | <b>0.00</b>                   | <b>22.58</b>                     | <b>67.74</b>           | <b>9.68</b>                                      | <b>9.97</b>                                  | <b>10.02</b>                                   |
| 42.00         | 79.49                              | 0.00                                     | 12.82                         | 7.69                             | 92.31                  | 0.00                                             | 11.31                                        | 11.39                                          |
| <b>50.00</b>  | <b>60.78</b>                       | <b>0.00</b>                              | <b>0.00</b>                   | <b>35.29</b>                     | <b>60.78</b>           | <b>3.92</b>                                      | <b>13.92</b>                                 | <b>14.03</b>                                   |
| <b>54.00</b>  | <b>77.78</b>                       | <b>0.00</b>                              | <b>0.00</b>                   | <b>13.33</b>                     | <b>77.78</b>           | <b>8.89</b>                                      | <b>9.77</b>                                  | <b>9.82</b>                                    |
| 58.00         | 63.27                              | 0.00                                     | 8.16                          | 28.57                            | 71.43                  | 0.00                                             | 16.09                                        | 16.23                                          |
| 62.00         | 85.11                              | 0.00                                     | 0.00                          | 14.89                            | 85.11                  | 0.00                                             | 9.22                                         | 9.26                                           |
| 66.00         | 66.13                              | 0.00                                     | 12.90                         | 20.97                            | 79.03                  | 0.00                                             | 11.18                                        | 11.25                                          |
| 70.00         | 56.67                              | 0.00                                     | 0.00                          | 43.33                            | 56.67                  | 0.00                                             | 10.26                                        | 10.32                                          |
| 78.00         | 38.89                              | 0.00                                     | 5.56                          | 55.56                            | 44.44                  | 0.00                                             | 13.97                                        | 14.09                                          |
| 82.00         | 24.44                              | 0.00                                     | 75.56                         | 0.00                             | 100.00                 | 0.00                                             | 14.67                                        | 14.79                                          |
| 86.00         | 62.50                              | 0.00                                     | 5.00                          | 32.50                            | 67.50                  | 0.00                                             | 11.52                                        | 11.60                                          |
| <b>90.00</b>  | <b>50.00</b>                       | <b>0.00</b>                              | <b>15.00</b>                  | <b>22.50</b>                     | <b>65.00</b>           | <b>12.50</b>                                     | <b>12.15</b>                                 | <b>12.24</b>                                   |
| <b>94.00</b>  | <b>44.44</b>                       | <b>0.00</b>                              | <b>27.78</b>                  | <b>22.22</b>                     | <b>72.22</b>           | <b>5.56</b>                                      | <b>9.67</b>                                  | <b>9.72</b>                                    |
| 102.00        | 22.22                              | 0.00                                     | 19.44                         | 58.33                            | 41.67                  | 0.00                                             | 11.55                                        | 11.63                                          |
| 106.00        | 10.71                              | 0.00                                     | 0.00                          | 89.29                            | 10.71                  | 0.00                                             | 10.96                                        | 11.03                                          |
| 110.00        | 6.06                               | 0.00                                     | 0.00                          | 93.94                            | 6.06                   | 0.00                                             | 5.81                                         | 5.80                                           |
| 114.00        | 3.33                               | 0.00                                     | 0.00                          | 96.67                            | 3.33                   | 0.00                                             | 7.66                                         | 7.69                                           |
| 118.00        | 0.00                               | 0.00                                     | 100.00                        | 0.00                             | 100.00                 | 0.00                                             | 6.76                                         | 6.77                                           |
| 122.00        | 81.82                              | 18.18                                    | 0.00                          | 0.00                             | 100.00                 | 0.00                                             | 10.88                                        | 10.94                                          |
| 126.00        | 100.00                             | 0.00                                     | 0.00                          | 0.00                             | 100.00                 | 0.00                                             | 9.70                                         | 9.75                                           |
| 130.00        | 4.08                               | 53.06                                    | 0.00                          | 42.86                            | 57.14                  | 0.00                                             | 12.37                                        | 12.46                                          |
| 134.00        | 11.11                              | 76.67                                    | 0.00                          | 12.22                            | 87.78                  | 0.00                                             | 13.81                                        | 13.93                                          |
| 138.00        | 52.83                              | 47.17                                    | 0.00                          | 0.00                             | 100.00                 | 0.00                                             | 9.24                                         | 9.28                                           |
| 142.00        | 22.63                              | 59.85                                    | 0.00                          | 17.52                            | 82.48                  | 0.00                                             | 10.58                                        | 10.64                                          |
| 146.00        | 50.53                              | 49.47                                    | 0.00                          | 0.00                             | 100.00                 | 0.00                                             | 13.15                                        | 13.25                                          |
| 150.00        | 51.69                              | 39.33                                    | 0.00                          | 8.99                             | 91.01                  | 0.00                                             | 7.47                                         | 7.48                                           |
| 158.00        | 47.30                              | 22.97                                    | 0.00                          | 29.73                            | 70.27                  | 0.00                                             | 11.61                                        | 11.69                                          |
| 162.00        | 66.67                              | 33.33                                    | 0.00                          | 0.00                             | 100.00                 | 0.00                                             | 11.07                                        | 11.14                                          |

|               |              |              |              |              |              |              |              |              |
|---------------|--------------|--------------|--------------|--------------|--------------|--------------|--------------|--------------|
| 166.00        | 39.39        | 24.24        | 0.00         | 36.36        | 63.64        | 0.00         | 14.06        | 14.18        |
| 170.00        | 42.00        | 24.00        | 4.00         | 30.00        | 70.00        | 0.00         | 13.03        | 13.13        |
| 174.00        | 61.11        | 11.11        | 5.56         | 22.22        | 77.78        | 0.00         | 13.67        | 13.78        |
| 178.00        | 41.33        | 32.00        | 2.67         | 24.00        | 76.00        | 0.00         | 12.17        | 12.26        |
| 182.00        | 65.71        | 22.86        | 0.00         | 11.43        | 88.57        | 0.00         | 14.07        | 14.18        |
| 190.00        | 73.68        | 15.79        | 3.16         | 7.37         | 92.63        | 0.00         | 13.68        | 13.79        |
| 194.00        | 92.16        | 7.84         | 0.00         | 0.00         | 100.00       | 0.00         | 14.09        | 14.21        |
| 198.00        | 92.06        | 7.94         | 0.00         | 0.00         | 100.00       | 0.00         | 10.73        | 10.80        |
| 202.00        | 43.24        | 56.76        | 0.00         | 0.00         | 100.00       | 0.00         | 13.24        | 13.34        |
| 206.00        | 71.83        | 15.49        | 0.00         | 12.68        | 87.32        | 0.00         | 14.49        | 14.61        |
| 210.00        | 69.70        | 6.06         | 0.00         | 24.24        | 75.76        | 0.00         | 13.61        | 13.72        |
| 214.00        | 40.00        | 8.57         | 0.00         | 51.43        | 48.57        | 0.00         | 13.95        | 14.06        |
| 218.00        | 88.89        | 11.11        | 0.00         | 0.00         | 100.00       | 0.00         | 14.71        | 14.83        |
| 222.00        | 38.46        | 57.69        | 0.00         | 3.85         | 96.15        | 0.00         | 14.72        | 14.84        |
| 226.00        | 86.49        | 9.46         | 0.00         | 4.05         | 95.95        | 0.00         | 10.28        | 10.34        |
| 234.00        | 66.22        | 10.81        | 0.00         | 22.97        | 77.03        | 0.00         | 12.30        | 12.39        |
| 238.00        | 59.57        | 28.72        | 0.00         | 11.70        | 88.30        | 0.00         | 12.67        | 12.77        |
| <b>242.00</b> | <b>43.48</b> | <b>52.17</b> | <b>0.00</b>  | <b>0.00</b>  | <b>95.65</b> | <b>4.35</b>  | <b>14.42</b> | <b>14.55</b> |
| 246.00        | 3.70         | 62.96        | 0.00         | 33.33        | 66.67        | 0.00         | 13.91        | 14.02        |
| 250.00        | 57.89        | 42.11        | 0.00         | 0.00         | 100.00       | 0.00         | 12.89        | 12.99        |
| 254.00        | 53.49        | 46.51        | 0.00         | 0.00         | 100.00       | 0.00         | 17.74        | 17.91        |
| 258.00        | 51.92        | 40.38        | 7.69         | 0.00         | 100.00       | 0.00         | 13.92        | 14.03        |
| 262.00        | 36.49        | 63.51        | 0.00         | 0.00         | 100.00       | 0.00         | 12.37        | 12.46        |
| 266.00        | 37.68        | 52.17        | 0.00         | 10.14        | 89.86        | 0.00         | 14.39        | 14.51        |
| 270.00        | 52.05        | 24.66        | 8.22         | 15.07        | 84.93        | 0.00         | 13.56        | 13.67        |
| 274.00        | 11.36        | 79.55        | 2.27         | 6.82         | 93.18        | 0.00         | 15.48        | 15.62        |
| 282.00        | 14.29        | 61.90        | 4.76         | 19.05        | 80.95        | 0.00         | 13.71        | 13.82        |
| 286.00        | 5.26         | 80.26        | 2.63         | 11.84        | 88.16        | 0.00         | 13.90        | 14.01        |
| <b>290.00</b> | <b>16.98</b> | <b>64.15</b> | <b>3.77</b>  | <b>11.32</b> | <b>84.91</b> | <b>3.77</b>  | <b>9.52</b>  | <b>9.56</b>  |
| 294.00        | 18.92        | 81.08        | 0.00         | 0.00         | 100.00       | 0.00         | 10.30        | 10.36        |
| 298.00        | 8.11         | 51.35        | 5.41         | 35.14        | 64.86        | 0.00         | 12.99        | 13.09        |
| 302.00        | 35.71        | 50.00        | 14.29        | 0.00         | 100.00       | 0.00         | 10.81        | 10.87        |
| 306.00        | 14.81        | 59.26        | 0.00         | 25.93        | 74.07        | 0.00         | 12.32        | 12.40        |
| <b>310.00</b> | <b>14.81</b> | <b>40.74</b> | <b>0.00</b>  | <b>37.04</b> | <b>55.56</b> | <b>7.41</b>  | <b>10.81</b> | <b>10.88</b> |
| <b>314.00</b> | <b>0.00</b>  | <b>42.86</b> | <b>28.57</b> | <b>0.00</b>  | <b>71.43</b> | <b>28.57</b> | <b>12.98</b> | <b>13.08</b> |
| 318.00        | 33.33        | 55.56        | 11.11        | 0.00         | 100.00       | 0.00         | 13.21        | 13.32        |
| <b>322.00</b> | <b>18.18</b> | <b>9.09</b>  | <b>40.91</b> | <b>0.00</b>  | <b>68.18</b> | <b>31.82</b> | <b>9.41</b>  | <b>9.46</b>  |
| <b>326.00</b> | <b>9.09</b>  | <b>6.06</b>  | <b>24.24</b> | <b>48.48</b> | <b>39.39</b> | <b>12.12</b> | <b>9.79</b>  | <b>9.85</b>  |
| 330.00        | 16.67        | 16.67        | 16.67        | 50.00        | 50.00        | 0.00         | 10.11        | 10.16        |
| <b>334.00</b> | <b>15.38</b> | <b>0.00</b>  | <b>15.38</b> | <b>61.54</b> | <b>30.77</b> | <b>7.69</b>  | <b>14.08</b> | <b>14.19</b> |

|               |              |              |              |              |              |               |              |              |
|---------------|--------------|--------------|--------------|--------------|--------------|---------------|--------------|--------------|
| 338.00        | 0.00         | 0.00         | 0.00         | 100.00       | 0.00         | 0.00          | 13.55        | 13.66        |
| 342.00        | 0.00         | 0.00         | 23.08        | 76.92        | 23.08        | 0.00          | 13.01        | 13.11        |
| 346.00        | 10.26        | 7.69         | 5.13         | 76.92        | 23.08        | 0.00          | 13.64        | 13.75        |
| 350.00        | 0.00         | 0.00         | 3.23         | 96.77        | 3.23         | 0.00          | 12.72        | 12.81        |
| <b>354.00</b> | <b>8.33</b>  | <b>4.17</b>  | <b>0.00</b>  | <b>83.33</b> | <b>12.50</b> | <b>4.17</b>   | <b>10.80</b> | <b>10.86</b> |
| <b>358.00</b> | <b>0.00</b>  | <b>0.00</b>  | <b>3.70</b>  | <b>92.59</b> | <b>3.70</b>  | <b>3.70</b>   | <b>13.47</b> | <b>13.58</b> |
| 362.00        | 50.00        | 33.33        | 16.67        | 0.00         | 100.00       | 0.00          | 11.73        | 11.81        |
| 366.00        | 77.27        | 22.73        | 0.00         | 0.00         | 100.00       | 0.00          | 9.36         | 9.40         |
| 370.00        | 23.08        | 23.08        | 17.95        | 35.90        | 64.10        | 0.00          | 9.96         | 10.01        |
| <b>374.00</b> | <b>14.29</b> | <b>28.57</b> | <b>28.57</b> | <b>0.00</b>  | <b>71.43</b> | <b>28.57</b>  | <b>12.13</b> | <b>12.22</b> |
| <b>378.00</b> | <b>2.60</b>  | <b>5.19</b>  | <b>15.58</b> | <b>74.03</b> | <b>23.38</b> | <b>2.60</b>   | <b>9.76</b>  | <b>9.81</b>  |
| 382.00        | 66.67        | 16.67        | 16.67        | 0.00         | 100.00       | 0.00          | 10.88        | 10.95        |
| 386.00        | 33.33        | 33.33        | 33.33        | 0.00         | 100.00       | 0.00          | 10.88        | 10.95        |
| <b>390.00</b> | <b>27.27</b> | <b>0.00</b>  | <b>36.36</b> | <b>27.27</b> | <b>63.64</b> | <b>9.09</b>   | <b>10.61</b> | <b>10.67</b> |
| <b>394.00</b> | <b>38.46</b> | <b>0.00</b>  | <b>30.77</b> | <b>0.00</b>  | <b>69.23</b> | <b>30.77</b>  | <b>7.99</b>  | <b>8.02</b>  |
| <b>398.00</b> | <b>0.00</b>  | <b>0.00</b>  | <b>42.86</b> | <b>14.29</b> | <b>42.86</b> | <b>42.86</b>  | <b>8.63</b>  | <b>8.66</b>  |
| <b>402.00</b> | <b>13.33</b> | <b>26.67</b> | <b>26.67</b> | <b>20.00</b> | <b>66.67</b> | <b>13.33</b>  | <b>12.54</b> | <b>12.63</b> |
| <b>406.00</b> | <b>13.33</b> | <b>0.00</b>  | <b>26.67</b> | <b>40.00</b> | <b>40.00</b> | <b>20.00</b>  | <b>11.87</b> | <b>11.96</b> |
| <b>410.00</b> | <b>0.00</b>  | <b>0.00</b>  | <b>0.00</b>  | <b>0.00</b>  | <b>0.00</b>  | <b>100.00</b> | <b>12.17</b> | <b>12.26</b> |
| <b>414.00</b> | <b>0.00</b>  | <b>0.00</b>  | <b>0.00</b>  | <b>0.00</b>  | <b>0.00</b>  | <b>100.00</b> | <b>10.97</b> | <b>11.04</b> |
| <b>418.00</b> | <b>0.00</b>  | <b>0.00</b>  | <b>16.67</b> | <b>25.00</b> | <b>16.67</b> | <b>58.33</b>  | <b>10.07</b> | <b>10.12</b> |
| <b>422.00</b> | <b>0.00</b>  | <b>0.00</b>  | <b>0.00</b>  | <b>0.00</b>  | <b>0.00</b>  | <b>100.00</b> | <b>13.32</b> | <b>13.42</b> |
| <b>424.00</b> | <b>0.00</b>  | <b>0.00</b>  | <b>0.00</b>  | <b>0.00</b>  | <b>0.00</b>  | <b>100.00</b> | <b>9.93</b>  | <b>9.98</b>  |

\* from Jones et al., 2014

\*\* Using equation  $y = 1.0148x - 0.0927$  from Jones et al., 2014 for the conversion of bulk to cellulose  $\delta^{18}\text{O}$

Bold values indicate samples where moss + *Carex* macrofossils did not combine to equal 100% and were omitted from species effects analysis

Supplemental Table 2. Horse trail fen core data adapted from Jones et al., 2014

| Depth<br>(cm) | <i>Sphagnum</i><br>(%) | <i>Tomenth-<br/>ypnum<br/>nitens</i> (%) | Other<br>brown<br>moss<br>(%) | Moss<br>total<br>(%) | Sedge<br>( <i>Carex</i> )<br>(%) | Residual<br>macrofoss<br>il (%) | $\delta^{18}\text{O}$ to<br>cellulose<br>(‰)** | Single<br>value<br>$\delta^{18}\text{O}$<br>adjusted<br>to water<br>(‰) | Species-<br>adjusted<br>$\delta^{18}\text{O}$ to<br>water<br>(‰) |
|---------------|------------------------|------------------------------------------|-------------------------------|----------------------|----------------------------------|---------------------------------|------------------------------------------------|-------------------------------------------------------------------------|------------------------------------------------------------------|
| 10            | 97.06                  | 0.00                                     | 2.94                          | 100.00               | 0.00                             | 0.00                            | 12.95                                          | -19.95                                                                  | -21.04                                                           |
| 14            | 88.46                  | 0.00                                     | 0.00                          | 88.46                | 11.54                            | 0.00                            | 11.27                                          | -21.46                                                                  | -23.53                                                           |
| 18            | 90.32                  | 0.00                                     | 0.00                          | 90.32                | 9.68                             | 0.00                            | 11.12                                          | -21.63                                                                  | -23.55                                                           |
| 22            | 47.62                  | 0.00                                     | 0.00                          | 47.62                | 52.38                            | 0.00                            | 9.45                                           | -22.67                                                                  | -28.27                                                           |
| 26            | 16.67                  | 0.00                                     | 0.00                          | 16.67                | 83.33                            | 0.00                            | 7.74                                           | -23.91                                                                  | -32.18                                                           |
| 30            | 66.67                  | 0.00                                     | 3.33                          | 70.00                | 30.00                            | 0.00                            | 8.55                                           | -23.90                                                                  | -27.55                                                           |
| 34            | 56.00                  | 0.00                                     | 0.00                          | 56.00                | 44.00                            | 0.00                            | 10.38                                          | -21.86                                                                  | -26.74                                                           |

|           |              |             |              |              |              |              |              |        |        |
|-----------|--------------|-------------|--------------|--------------|--------------|--------------|--------------|--------|--------|
| <b>38</b> | <b>67.74</b> | <b>0.00</b> | <b>0.00</b>  | <b>67.74</b> | <b>22.58</b> | <b>9.68</b>  | <b>10.02</b> |        |        |
| 42        | 79.49        | 0.00        | 12.82        | 92.31        | 7.69         | 0.00         | 11.39        | -21.40 | -23.14 |
| <b>50</b> | <b>60.78</b> | <b>0.00</b> | <b>0.00</b>  | <b>60.78</b> | <b>35.29</b> | <b>3.92</b>  | <b>14.03</b> |        |        |
| <b>54</b> | <b>77.78</b> | <b>0.00</b> | <b>0.00</b>  | <b>77.78</b> | <b>13.33</b> | <b>8.89</b>  | <b>9.82</b>  |        |        |
| 58        | 63.27        | 0.00        | 8.16         | 71.43        | 28.57        | 0.00         | 16.23        | -16.24 | -19.87 |
| 62        | 85.11        | 0.00        | 0.00         | 85.11        | 14.89        | 0.00         | 9.26         | -23.42 | -25.76 |
| 66        | 66.13        | 0.00        | 12.90        | 79.03        | 20.97        | 0.00         | 11.25        | -21.33 | -24.23 |
| 70        | 56.67        | 0.00        | 0.00         | 56.67        | 43.33        | 0.00         | 10.32        | -21.93 | -26.76 |
| 78        | 38.89        | 0.00        | 5.56         | 44.44        | 55.56        | 0.00         | 14.09        | -17.98 | -23.93 |
| 82        | 24.44        | 0.00        | 75.56        | 100.00       | 0.00         | 0.00         | 14.79        | -18.11 | -19.23 |
| 86        | 62.50        | 0.00        | 5.00         | 67.50        | 32.50        | 0.00         | 11.60        | -20.81 | -24.72 |
| <b>90</b> | <b>50.00</b> | <b>0.00</b> | <b>15.00</b> | <b>65.00</b> | <b>22.50</b> | <b>12.50</b> | <b>12.24</b> |        |        |
| <b>94</b> | <b>44.44</b> | <b>0.00</b> | <b>27.78</b> | <b>72.22</b> | <b>22.22</b> | <b>5.56</b>  | <b>9.72</b>  |        |        |
| 102       | 22.22        | 0.00        | 19.44        | 41.67        | 58.33        | 0.00         | 11.63        | -20.40 | -26.55 |
| 106       | 10.71        | 0.00        | 0.00         | 10.71        | 89.29        | 0.00         | 11.03        | -20.53 | -29.37 |
| 110       | 6.06         | 0.00        | 0.00         | 6.06         | 93.94        | 0.00         | 5.80         | -25.69 | -34.86 |
| 114       | 3.33         | 0.00        | 0.00         | 3.33         | 96.67        | 0.00         | 7.69         | -23.76 | -33.20 |
| 118       | 0.00         | 0.00        | 100.00       | 100.00       | 0.00         | 0.00         | 6.77         | -26.13 | -27.14 |
| 122       | 81.82        | 18.18       | 0.00         | 100.00       | 0.00         | 0.00         | 10.94        | -21.96 | -23.02 |
| 126       | 100.00       | 0.00        | 0.00         | 100.00       | 0.00         | 0.00         | 9.75         | -23.15 | -24.20 |
| 130       | 4.08         | 53.06       | 0.00         | 57.14        | 42.86        | 0.00         | 12.46        | -19.79 | -24.61 |
| 134       | 11.11        | 76.67       | 0.00         | 87.78        | 12.22        | 0.00         | 13.93        | -18.79 | -20.97 |
| 138       | 52.83        | 47.17       | 0.00         | 100.00       | 0.00         | 0.00         | 9.28         | -23.62 | -24.66 |
| 142       | 22.63        | 59.85       | 0.00         | 82.48        | 17.52        | 0.00         | 10.64        | -21.99 | -24.58 |
| 146       | 50.53        | 49.47       | 0.00         | 100.00       | 0.00         | 0.00         | 13.25        | -19.65 | -20.75 |
| 150       | 51.69        | 39.33       | 0.00         | 91.01        | 8.99         | 0.00         | 7.48         | -25.28 | -27.08 |
| 158       | 47.30        | 22.97       | 0.00         | 70.27        | 29.73        | 0.00         | 11.69        | -20.76 | -24.43 |
| 162       | 66.67        | 33.33       | 0.00         | 100.00       | 0.00         | 0.00         | 11.14        | -21.76 | -22.83 |
| 166       | 39.39        | 24.24       | 0.00         | 63.64        | 36.36        | 0.00         | 14.18        | -18.18 | -22.46 |
| 170       | 42.00        | 24.00       | 4.00         | 70.00        | 30.00        | 0.00         | 13.13        | -19.32 | -23.03 |
| 174       | 61.11        | 11.11       | 5.56         | 77.78        | 22.22        | 0.00         | 13.78        | -18.79 | -21.83 |
| 178       | 41.33        | 32.00       | 2.67         | 76.00        | 24.00        | 0.00         | 12.26        | -20.28 | -23.45 |
| 182       | 65.71        | 22.86       | 0.00         | 88.57        | 11.43        | 0.00         | 14.18        | -18.54 | -20.65 |
| 190       | 73.68        | 15.79       | 3.16         | 92.63        | 7.37         | 0.00         | 13.79        | -19.00 | -20.75 |
| 194       | 92.16        | 7.84        | 0.00         | 100.00       | 0.00         | 0.00         | 14.21        | -18.69 | -19.81 |
| 198       | 92.06        | 7.94        | 0.00         | 100.00       | 0.00         | 0.00         | 10.80        | -22.10 | -23.17 |
| 202       | 43.24        | 56.76       | 0.00         | 100.00       | 0.00         | 0.00         | 13.34        | -19.56 | -20.66 |
| 206       | 71.83        | 15.49       | 0.00         | 87.32        | 12.68        | 0.00         | 14.61        | -18.10 | -20.33 |
| 210       | 69.70        | 6.06        | 0.00         | 75.76        | 24.24        | 0.00         | 13.72        | -18.82 | -22.04 |
| 214       | 40.00        | 8.57        | 0.00         | 48.57        | 51.43        | 0.00         | 14.06        | -18.07 | -23.65 |

|            |              |              |              |              |              |              |              |        |        |
|------------|--------------|--------------|--------------|--------------|--------------|--------------|--------------|--------|--------|
| 218        | 88.89        | 11.11        | 0.00         | 100.00       | 0.00         | 0.00         | 14.83        | -18.07 | -19.19 |
| 222        | 38.46        | 57.69        | 0.00         | 96.15        | 3.85         | 0.00         | 14.84        | -18.00 | -19.46 |
| 226        | 86.49        | 9.46         | 0.00         | 95.95        | 4.05         | 0.00         | 10.34        | -22.50 | -23.91 |
| 234        | 66.22        | 10.81        | 0.00         | 77.03        | 22.97        | 0.00         | 12.39        | -20.17 | -23.25 |
| 238        | 59.57        | 28.72        | 0.00         | 88.30        | 11.70        | 0.00         | 12.77        | -19.96 | -22.07 |
| <b>242</b> | <b>43.48</b> | <b>52.17</b> | <b>0.00</b>  | <b>95.65</b> | <b>0.00</b>  | <b>4.35</b>  | <b>14.55</b> |        |        |
| 246        | 3.70         | 62.96        | 0.00         | 66.67        | 33.33        | 0.00         | 14.02        | -18.38 | -22.39 |
| 250        | 57.89        | 42.11        | 0.00         | 100.00       | 0.00         | 0.00         | 12.99        | -19.91 | -21.01 |
| 254        | 53.49        | 46.51        | 0.00         | 100.00       | 0.00         | 0.00         | 17.91        | -14.99 | -16.16 |
| 258        | 51.92        | 40.38        | 7.69         | 100.00       | 0.00         | 0.00         | 14.03        | -18.87 | -19.98 |
| 262        | 36.49        | 63.51        | 0.00         | 100.00       | 0.00         | 0.00         | 12.46        | -20.44 | -21.53 |
| 266        | 37.68        | 52.17        | 0.00         | 89.86        | 10.14        | 0.00         | 14.51        | -18.24 | -20.24 |
| 270        | 52.05        | 24.66        | 8.22         | 84.93        | 15.07        | 0.00         | 13.67        | -19.00 | -21.42 |
| 274        | 11.36        | 79.55        | 2.27         | 93.18        | 6.82         | 0.00         | 15.62        | -17.18 | -18.91 |
| 282        | 14.29        | 61.90        | 4.76         | 80.95        | 19.05        | 0.00         | 13.82        | -18.80 | -21.57 |
| 286        | 5.26         | 80.26        | 2.63         | 88.16        | 11.84        | 0.00         | 14.01        | -18.71 | -20.85 |
| <b>290</b> | <b>16.98</b> | <b>64.15</b> | <b>3.77</b>  | <b>84.91</b> | <b>11.32</b> | <b>3.77</b>  | <b>9.56</b>  |        |        |
| 294        | 18.92        | 81.08        | 0.00         | 100.00       | 0.00         | 0.00         | 10.36        | -22.54 | -23.60 |
| 298        | 8.11         | 51.35        | 5.41         | 64.86        | 35.14        | 0.00         | 13.09        | -19.28 | -23.44 |
| 302        | 35.71        | 50.00        | 14.29        | 100.00       | 0.00         | 0.00         | 10.87        | -22.03 | -23.09 |
| 306        | 14.81        | 59.26        | 0.00         | 74.07        | 25.93        | 0.00         | 12.40        | -20.11 | -23.45 |
| <b>310</b> | <b>14.81</b> | <b>40.74</b> | <b>0.00</b>  | <b>55.56</b> | <b>37.04</b> | <b>7.41</b>  | <b>10.88</b> |        |        |
| <b>314</b> | <b>0.00</b>  | <b>42.86</b> | <b>28.57</b> | <b>71.43</b> | <b>0.00</b>  | <b>28.57</b> | <b>13.08</b> |        |        |
| 318        | 33.33        | 55.56        | 11.11        | 100.00       | 0.00         | 0.00         | 13.32        | -19.58 | -20.69 |
| <b>322</b> | <b>18.18</b> | <b>9.09</b>  | <b>40.91</b> | <b>68.18</b> | <b>0.00</b>  | <b>31.82</b> | <b>9.46</b>  |        |        |
| <b>326</b> | <b>9.09</b>  | <b>6.06</b>  | <b>24.24</b> | <b>39.39</b> | <b>48.48</b> | <b>12.12</b> | <b>9.85</b>  |        |        |
| 330        | 16.67        | 16.67        | 16.67        | 50.00        | 50.00        | 0.00         | 10.16        | -21.99 | -27.39 |
| <b>334</b> | <b>15.38</b> | <b>0.00</b>  | <b>15.38</b> | <b>30.77</b> | <b>61.54</b> | <b>7.69</b>  | <b>14.19</b> |        |        |
| 338        | 0.00         | 0.00         | 0.00         | 0.00         | 100.00       | 0.00         | 13.66        | -17.74 | -27.55 |
| 342        | 0.00         | 0.00         | 23.08        | 23.08        | 76.92        | 0.00         | 13.11        | -18.63 | -26.42 |
| 346        | 10.26        | 7.69         | 5.13         | 23.08        | 76.92        | 0.00         | 13.75        | -17.99 | -25.80 |
| 350        | 0.00         | 0.00         | 3.23         | 3.23         | 96.77        | 0.00         | 12.81        | -18.64 | -28.15 |
| <b>354</b> | <b>8.33</b>  | <b>4.17</b>  | <b>0.00</b>  | <b>12.50</b> | <b>83.33</b> | <b>4.17</b>  | <b>10.86</b> |        |        |
| <b>358</b> | <b>0.00</b>  | <b>0.00</b>  | <b>3.70</b>  | <b>3.70</b>  | <b>92.59</b> | <b>3.70</b>  | <b>13.58</b> |        |        |
| 362        | 50.00        | 33.33        | 16.67        | 100.00       | 0.00         | 0.00         | 11.81        | -21.09 | -22.17 |
| 366        | 77.27        | 22.73        | 0.00         | 100.00       | 0.00         | 0.00         | 9.40         | -23.50 | -24.54 |
| 370        | 23.08        | 23.08        | 17.95        | 64.10        | 35.90        | 0.00         | 10.01        | -22.35 | -26.53 |
| <b>374</b> | <b>14.29</b> | <b>28.57</b> | <b>28.57</b> | <b>71.43</b> | <b>0.00</b>  | <b>28.57</b> | <b>12.22</b> |        |        |
| <b>378</b> | <b>2.60</b>  | <b>5.19</b>  | <b>15.58</b> | <b>23.38</b> | <b>74.03</b> | <b>2.60</b>  | <b>9.81</b>  |        |        |
| 382        | 66.67        | 16.67        | 16.67        | 100.00       | 0.00         | 0.00         | 10.95        | -21.95 | -23.02 |

|            |              |              |              |              |              |               |              |        |        |
|------------|--------------|--------------|--------------|--------------|--------------|---------------|--------------|--------|--------|
| 386        | 33.33        | 33.33        | 33.33        | 100.00       | 0.00         | 0.00          | 10.95        | -21.95 | -23.02 |
| <b>390</b> | <b>27.27</b> | <b>0.00</b>  | <b>36.36</b> | <b>63.64</b> | <b>27.27</b> | <b>9.09</b>   | <b>10.67</b> |        |        |
| <b>394</b> | <b>38.46</b> | <b>0.00</b>  | <b>30.77</b> | <b>69.23</b> | <b>0.00</b>  | <b>30.77</b>  | <b>8.02</b>  |        |        |
| <b>398</b> | <b>0.00</b>  | <b>0.00</b>  | <b>42.86</b> | <b>42.86</b> | <b>14.29</b> | <b>42.86</b>  | <b>8.66</b>  |        |        |
| <b>402</b> | <b>13.33</b> | <b>26.67</b> | <b>26.67</b> | <b>66.67</b> | <b>20.00</b> | <b>13.33</b>  | <b>12.63</b> |        |        |
| <b>406</b> | <b>13.33</b> | <b>0.00</b>  | <b>26.67</b> | <b>40.00</b> | <b>40.00</b> | <b>20.00</b>  | <b>11.96</b> |        |        |
| <b>410</b> | <b>0.00</b>  | <b>0.00</b>  | <b>0.00</b>  | <b>0.00</b>  | <b>0.00</b>  | <b>100.00</b> | <b>12.26</b> |        |        |
| <b>414</b> | <b>0.00</b>  | <b>0.00</b>  | <b>0.00</b>  | <b>0.00</b>  | <b>0.00</b>  | <b>100.00</b> | <b>11.04</b> |        |        |
| <b>418</b> | <b>0.00</b>  | <b>0.00</b>  | <b>16.67</b> | <b>16.67</b> | <b>25.00</b> | <b>58.33</b>  | <b>10.12</b> |        |        |
| <b>422</b> | <b>0.00</b>  | <b>0.00</b>  | <b>0.00</b>  | <b>0.00</b>  | <b>0.00</b>  | <b>100.00</b> | <b>13.42</b> |        |        |
| <b>424</b> | <b>0.00</b>  | <b>0.00</b>  | <b>0.00</b>  | <b>0.00</b>  | <b>0.00</b>  | <b>100.00</b> | <b>9.98</b>  |        |        |

Bold values indicate samples where moss + *Carex* macrofossils did not combine to equal 100% and were omitted from species effects analysis

\*\* Using equation  $y = 1.0148x - 0.0927$  from Jones et al., 2014 for the conversion of bulk to cellulose  $\delta^{18}\text{O}$ , stdev =  $\pm 3\text{‰}$ .

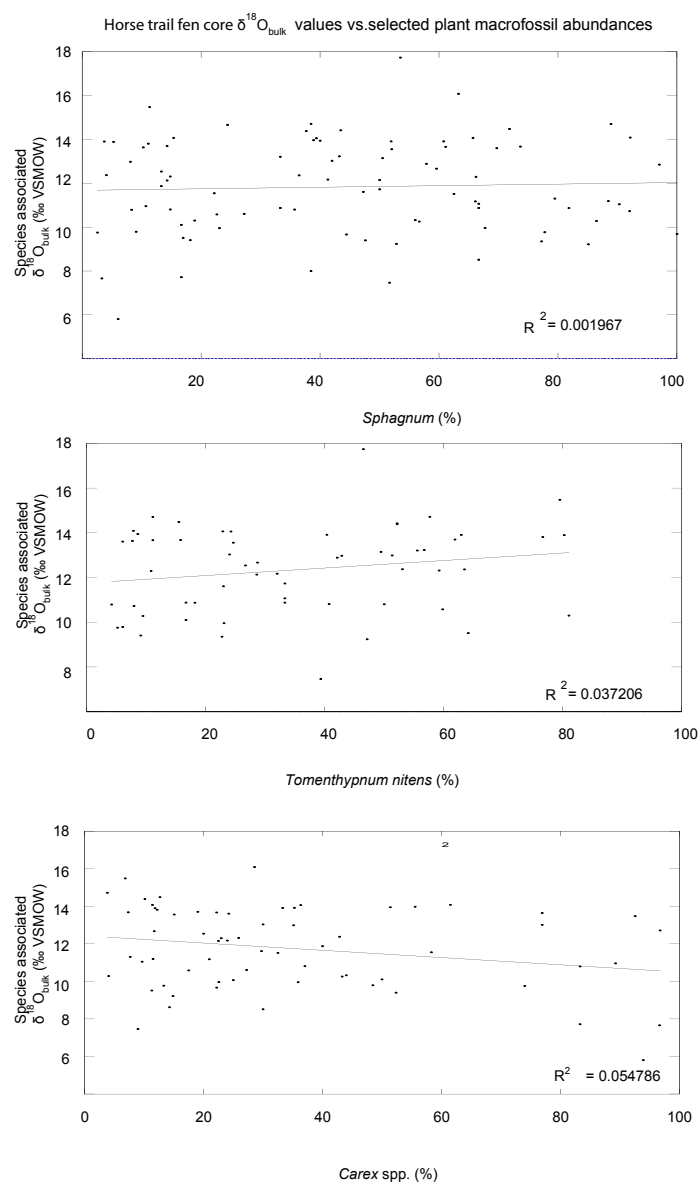

SI Figure 1. Horse trail fen core (HTF) from Jones et al., 2014, showing the relationship between the macrofossil abundance and the  $\delta^{18}\text{O}_{\text{bulk}}$  peat value recorded for the given sample.

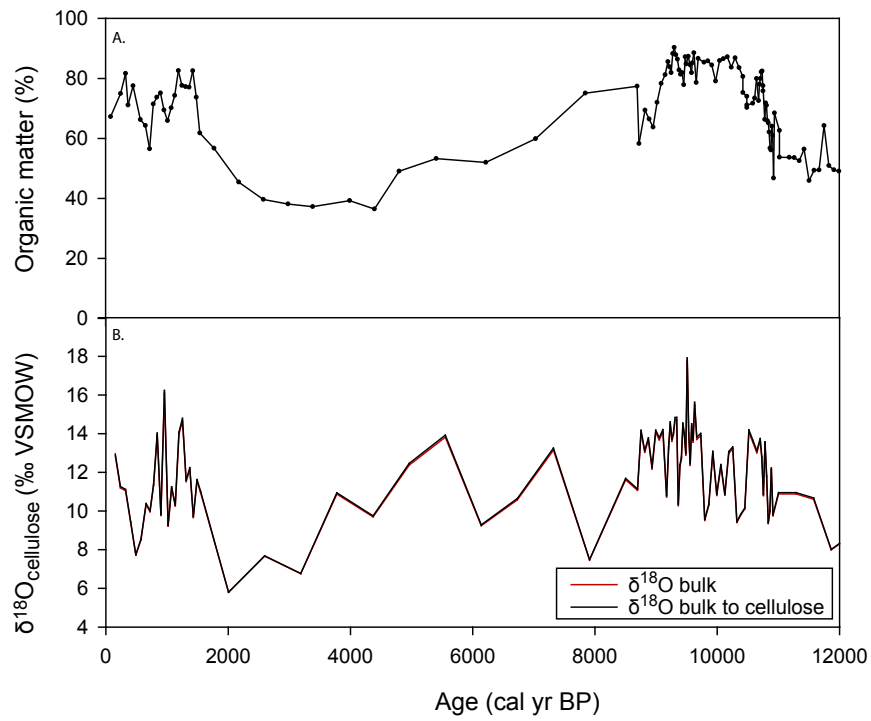

SI Figure 2. a. Horse trail fen (HTF) peat core loss-on-ignition and b. unaltered  $\delta^{18}\text{O}_{\text{bulk}}$  values plotted with the  $\delta^{18}\text{O}$  values that were converted to cellulose, using the relationship identified in Jones et al., 2014 and found in SI Table 2.
